# Supplementary material for: Decoding a neural circuit controlling global animal state in C. elegans
Source: eLife. 2015 Mar 11;4:e04241. doi: 10.7554/eLife.04241 (PMC4440410; doi:10.7554/eLife.04241)
Supplement: Supplementary file 4. — List of genes differentially expressed in Supplementary file 1 (npr-1 21% O2 vs npr-1 7% O2) and Supplementary file 2 (gcy-35; npr-1 21% O2 vs npr-1 21% O2) but not Supplementary file 3 (gcy-35; npr-1 21% O2 vs gcy-35; npr-1 7% O2). DOI: http://dx.doi.org/10.7554/eLife.04241.023 [file elife04241s004.xlsx]

## Sheet: Sheet1
List of genes differentially expressed in Supplementary File 1 (npr-1 21% O2 vs npr-1 7% O2) and Supplementary File 2 (gcy-35; npr-1 21% O2 vs npr-1 21% O2) but not Supplementary File 3 (gcy-35; npr-1 21% O2 vs gcy-35; npr-1 7% O2).
					DATA FROM SUPPLEMENTARY TABLE 1 with q < 0.05					DATA FROM SUPPLEMENTARY TABLE 2 with q < 0.05					DATA FROM SUPPLEMENTARY TABLE 3 with q > 0.05
Test_ID	Gene	Domain	Locus		npr-1_21% O2	npr-1_7% O2	Log2(fold_change)	q_value		gcy-35; npr-1 21% O2	npr-1 21% O2	Log2(fold_change)	q_value		gcy-35; npr-1 21% O2	gcy-35; npr-1 7% O2	Log2(fold_change)	q_value
XLOC_009722	C05B5.12		III:9987378-9987728		0	0.7435	inf	0.0253639		6.12769	0	#NAME?	0.00179424		6.12769	1.70884	-1.84232	0.0617386
XLOC_028334	cpr-4	Cysteine peptidase, asparagine active site | Cysteine peptidase, cysteine active site | Cysteine peptidase, histidine active site | Peptidase C1A | Peptidase C1A, papain C-terminal	V:6614673-6615845		173.475	299.902	0.789767	0.00179424		561.556	173.475	-1.69471	0.00179424		561.556	407.747	-0.461756	0.0621916
XLOC_014116	C28C12.4	Domain of unknown function DUF148	IV:8487496-8488423		13.9603	4.56091	-1.61393	0.00179424		4.12922	13.9603	1.75739	0.00179424		4.12922	7.47404	0.856021	0.0744402
XLOC_015043	ugt-22	UDP-glucuronosyl/UDP-glucosyltransferase	IV:13639265-13644401		17.1184	36.2808	1.08366	0.00179424		36.2516	17.1184	-1.0825	0.00179424		36.2516	49.5943	0.45213	0.113771
XLOC_036095	vit-1	Lipid transport protein, N-terminal | Lipid transport protein, beta-sheet shell | Vitellinogen, beta-sheet N-terminal | Vitellinogen, open beta-sheet | Vitellinogen, open beta-sheet, subdomain 2 | Vitellinogen, superhelical | von Willebrand factor, type D domain	X:7727900-7733308		134.14	276.567	1.04389	0.00179424		396.029	134.14	-1.56186	0.00179424		396.029	562.152	0.505354	0.117741
XLOC_029700	T01D3.6	EGF-like calcium-binding domain | EGF-like calcium-binding, conserved site | EGF-like, conserved site | EGF-type aspartate/asparagine hydroxylation site | Epidermal growth factor-like domain | Fibrinogen, alpha/beta/gamma chain, C-terminal globular domain | Fibrinogen, alpha/beta/gamma chain, C-terminal globular, subdomain 1 | Fibrinogen, alpha/beta/gamma chain, C-terminal globular, subdomain 2 |…	V:13716848-13720402		2.76394	9.91795	1.84332	0.00179424		24.4335	2.76394	-3.14406	0.00179424		24.4335	33.4493	0.453116	0.14525
XLOC_028115	F08F3.4	NAD(P)-binding domain | NAD-dependent epimerase/dehydratase, N-terminal domain	V:5410993-5412981		8.50287	19.6964	1.21191	0.00179424		19.9147	8.50287	-1.22781	0.00179424		19.9147	28.1401	0.498794	0.174935
XLOC_008566	Y119D3B.21		III:1214951-1215287		504.602	937.104	0.893063	0.00179424		1346.77	504.602	-1.41628	0.00179424		1346.77	1666.79	0.307571	0.229848
XLOC_035583	Y34B4A.5	Domain of unknown function DUF19	X:5257212-5260279		3.11561	9.39001	1.59161	0.00179424		16.4168	3.11561	-2.39758	0.00179424		16.4168	24.7839	0.594233	0.259176
XLOC_005126	F49E12.9	Fatty acid hydroxylase	II:8388124-8389891		6.64624	18.9885	1.51452	0.00179424		31.6451	6.64624	-2.25137	0.00179424		31.6451	41.2925	0.383899	0.395969
XLOC_019724	col-103	Nematode cuticle collagen, N-terminal	IV:762363-763722		153.889	95.0483	-0.695154	0.00179424		81.5851	153.889	0.915508	0.00179424		81.5851	91.5736	0.166625	0.657013
XLOC_019838	C23H5.8		IV:2111889-2113422		77.2001	149.24	0.950958	0.00179424		231.081	77.2001	-1.58173	0.00179424		231.081	201.874	-0.194943	0.668818
XLOC_019936	Y54G2A.28		IV:3009564-3012560		1.4905	21.2164	3.83131	0.00179424		25.4946	1.4905	-4.09633	0.00179424		25.4946	10.173	-1.32545	0.689565
XLOC_034817	col-19	Collagen triple helix repeat | Nematode cuticle collagen, N-terminal	X:421706-422776		522.61	292.488	-0.83736	0.00179424		330.189	522.61	0.662443	0.00179424		330.189	296.835	-0.153632	0.70552
XLOC_010254	Y34F4.4	Tight junction protein, claudin-like	III:1023192-1026258		0.707769	9.78334	3.78898	0.00179424		31.382	0.707769	-5.47052	0.00179424		31.382	24.2505	-0.371923	0.788108
XLOC_031906	ZC250.4		V:5812312-5813157		10.6585	34.4142	1.691	0.00179424		46.3749	10.6585	-2.12134	0.00179424		46.3749	52.8681	0.189053	0.807326
XLOC_000042	Y65B4BL.1	Domain of unknown function DB	I:530968-533386		88.8497	1.54616	-5.84461	0.00179424		3.75844	88.8497	4.56316	0.00179424		3.75844	3.13688	-0.260805	0.917719
XLOC_033326	F18E2.1	Calcineurin-like phosphoesterase domain, apaH type | Iron/zinc purple acid phosphatase-like C-terminal domain | Metallo-dependent phosphatase-like | Purple acid phosphatase, N-terminal | Purple acid phosphatase-like, N-terminal	V:12757557-12760099		10.64	26.2544	1.30306	0.00179424		42.1606	10.64	-1.9864	0.00179424		42.1606	45.0312	0.0950295	0.936725
XLOC_027802	C36C5.5	Domain of unknown function DUF19 | Uncharacterised protein family UPF0376	V:3157094-3157870		12.4271	31.6787	1.35003	0.00179424		47.0373	12.4271	-1.92032	0.00179424		47.0373	46.8668	-0.00523806	0.997899
XLOC_031395	F37B4.10,folt-2	Major facilitator superfamily domain | Reduced folate carrier | Thiamine transporter 1 | Zinc finger, C2H2 | Zinc finger, C2H2-like	V:2872388-2877635		118.114	201.377	0.769727	0.00322494		331.11	118.114	-1.48713	0.00179424		331.11	239.579	-0.466809	0.0814639
XLOC_030695	Y69H2.14	Collagen triple helix repeat | Nematode cuticle collagen, N-terminal	V:18638483-18639588		245.913	158.693	-0.631908	0.00322494		150.039	245.913	0.712808	0.00179424		150.039	162.675	0.116655	0.815342
XLOC_001705	gcy-35	Adenylyl cyclase class-3/4/guanylyl cyclase | Adenylyl cyclase class-3/4/guanylyl cyclase, conserved site | Haem NO binding associated | Heme-NO binding | NO signalling/Golgi transport ligand-binding domain | Nucleotide cyclase	I:13324106-13336143		22.5901	1.02197	-4.46627	0.00322494		1.33555	22.5901	4.08018	0.0133541		1.33555	0.948965	-0.493007	0.860994
XLOC_010642	ugt-62	UDP-glucuronosyl/UDP-glucosyltransferase	III:4537276-4540637		9.55218	20.0759	1.07156	0.00449627		34.0822	9.55218	-1.83512	0.00179424		34.0822	30.5013	-0.160148	0.834456
XLOC_033526	cyp-35C1	Cytochrome P450 | Cytochrome P450, E-class, group I | Cytochrome P450, conserved site	V:13896656-13898488		3.23904	8.46906	1.38664	0.00566068		10.0839	3.23904	-1.63841	0.00179424		10.0839	15.0157	0.574418	0.152096
XLOC_031813	Y49G5A.1	Proteinase inhibitor I2, Kunitz metazoa | Proteinase inhibitor I2, Kunitz, conserved site	V:5286342-5287360		2.05004	7.52438	1.87592	0.00566068		6.88738	2.05004	-1.74831	0.00976905		6.88738	3.73181	-0.884081	0.186529
XLOC_035864	cpr-6	Cysteine peptidase, asparagine active site | Cysteine peptidase, cysteine active site | Cysteine peptidase, histidine active site | Peptidase C1A | Peptidase C1A, papain C-terminal	X:6607202-6609046		487.651	754.521	0.629714	0.00676196		878.086	487.651	-0.848514	0.00179424		878.086	1168.43	0.412133	0.116093
XLOC_038209	F28B4.3	C-type lectin | C-type lectin fold | C-type lectin-like | EGF-like, conserved site | Epidermal growth factor-like domain | MD domain | von Willebrand factor, type A	X:3227488-3235408		5.31272	9.36538	0.817886	0.0077977		12.5136	5.31272	-1.23598	0.00179424		12.5136	17.4269	0.477815	0.0814639
XLOC_006615	C17F4.7*		II:3245086-3246015		746.035	482.441	-0.62889	0.00880194		3068.83	746.035	-2.04037	0.00179424		3068.83	2722.27	-0.172877	0.717681
XLOC_020600	elo-6	ELO family	IV:5386626-5388559		342.418	529.838	0.629792	0.00880194		742.379	342.418	-1.1164	0.00179424		742.379	701.068	-0.0826011	0.915551
XLOC_019776	clec-166	C-type lectin | C-type lectin fold | C-type lectin-like	IV:1247385-1251517		0.728158	2.15708	1.56676	0.00976905		7.06164	0.728158	-3.27768	0.00179424		7.06164	9.75309	0.465857	0.404091
XLOC_036800	F54F7.2		X:11843660-11845339		36.055	61.9594	0.781124	0.00976905		57.3908	36.055	-0.670621	0.0366069		57.3908	67.1643	0.226876	0.609559
XLOC_038782	ilys-5	Destabilase | Lysozyme-like domain	X:6533402-6536873		1154.29	1747.13	0.597983	0.00976905		2149.59	1154.29	-0.897056	0.00179424		2149.59	2395.19	0.156077	0.723874
XLOC_010055	col-98	Nematode cuticle collagen, N-terminal	III:13018933-13020261		192.773	128.523	-0.584878	0.00976905		111.725	192.773	0.786949	0.00179424		111.725	122.924	0.137819	0.766699
XLOC_028641	F52E1.14		V:8383921-8385927		96.5509	179.127	0.891624	0.0116372		280.86	96.5509	-1.54049	0.00179424		280.86	364.476	0.375974	0.44984
XLOC_034184	T05E12.6	CUB-like domain	V:17084977-17090023		39.153	62.1724	0.667153	0.0125084		102.132	39.153	-1.38324	0.00179424		102.132	89.5521	-0.189632	0.641879
XLOC_028529	ZK105.1	Domain of unknown function DUF19 | Uncharacterised protein family UPF0376	V:7713930-7714905		147.009	231.595	0.655697	0.0125084		252.622	147.009	-0.781077	0.00449627		252.622	276.153	0.128487	0.844412
XLOC_038923	spp-4	Saposin B | Saposin-like | Saposin-like type B, 2	X:7318274-7318776		40.5054	89.2762	1.14016	0.0133541		147.687	40.5054	-1.86636	0.00179424		147.687	194.185	0.394886	0.365839
XLOC_031827	C35A11.4	General substrate transporter | Major facilitator superfamily domain | Sugar/inositol transporter	V:5389478-5393148		2.49574	6.13684	1.29803	0.0133541		9.20073	2.49574	-1.88228	0.00179424		9.20073	11.3307	0.30042	0.692279
XLOC_002913	C31H5.6	Acyl-CoA thioester hydrolase/bile acid-CoA amino acid N-acetyltransferase | Acyl-CoA thioesterase, long chain | Alpha/Beta hydrolase fold | BAAT/Acyl-CoA thioester hydrolase C-terminal	I:9043318-9046889		4.26665	10.7402	1.33185	0.0141918		10.0126	4.26665	-1.23064	0.0158236		10.0126	15.5263	0.632892	0.155165
XLOC_022708	dod-24	CUB-like domain	IV:12940141-12941368		35.7843	63.3468	0.823945	0.0141918		146.063	35.7843	-2.0292	0.00179424		146.063	147.784	0.0168963	0.994157
XLOC_029554	ugt-16	UDP-glucuronosyl/UDP-glucosyltransferase	V:12825025-12827432		0.642288	2.09455	1.70535	0.0150179		4.08813	0.642288	-2.67015	0.00179424		4.08813	7.03441	0.782988	0.135862
XLOC_031472	C36C5.12	Domain of unknown function DUF19 | Uncharacterised protein family UPF0376	V:3158428-3159420		1.89383	6.68684	1.82002	0.0150179		11.8753	1.89383	-2.64859	0.00179424		11.8753	11.0894	-0.0987773	0.973791
XLOC_034769	F25C8.1		V:20907469-20909746		0.190962	0.664188	1.79831	0.0166036		1.08426	0.190962	-2.50535	0.00179424		1.08426	2.11686	0.965216	0.0657926
XLOC_022714	K10D11.6	CUB-like domain	IV:12986708-12989433		0.101102	0.573779	2.50468	0.0173756		1.08253	0.101102	-3.42052	0.0173756		1.08253	2.64464	1.28867	0.201938
XLOC_001885	rrn-3.56		I:15060298-15061159		716.124	434.542	-0.720714	0.0181516		401.665	716.124	0.834218	0.00179424		401.665	474.91	0.241661	0.611107
XLOC_035899	asp-3	Aspartic peptidase | Aspartic peptidase domain | Aspartic peptidase, active site	X:6791063-6792715		156.765	233.258	0.573324	0.0211422		297.428	156.765	-0.923939	0.00179424		297.428	398.587	0.422353	0.071056
XLOC_004448	F41C3.5	Alpha/Beta hydrolase fold | Peptidase S10, serine carboxypeptidase | Peptidase S10, serine carboxypeptidase, active site	II:4737616-4739906		326.929	465.616	0.510164	0.0225642		565.159	326.929	-0.789679	0.00179424		565.159	699.027	0.306693	0.248325
XLOC_028991	lys-1	Glycoside hydrolase superfamily | Glycoside hydrolase, catalytic domain	V:10277826-10279127		155.013	236.624	0.61021	0.0225642		630.381	155.013	-2.02384	0.00179424		630.381	765.051	0.279333	0.398742
XLOC_014432	Y43C5A.2	Fibrinogen, alpha/beta/gamma chain, C-terminal globular domain | Fibrinogen, alpha/beta/gamma chain, C-terminal globular, subdomain 1	IV:10269882-10272698		22.8782	38.2241	0.740512	0.0232859		60.5556	22.8782	-1.40429	0.00179424		60.5556	84.5655	0.48181	0.0640086
XLOC_037867	C44C1.5	AB-hydrolase YheT, putative | Alpha/Beta hydrolase fold | Alpha/beta hydrolase fold-1 | Uncharacterised protein family UPF0017, hydrolase-like, conserved site	X:975525-978445		8.152	16.6487	1.03018	0.0253639		16.8022	8.152	-1.04342	0.0141918		16.8022	18.9489	0.173465	0.860978
XLOC_030406	ZK218.5	ShKT domain	V:17101131-17101982		7.85191	2.85156	-1.46129	0.027346		2.12613	7.85191	1.88482	0.0077977		2.12613	1.32702	-0.680042	0.51599
XLOC_011402	ncx-7	Sodium/calcium exchanger membrane region	III:9715882-9720291		1.42317	3.49727	1.29712	0.0286327		4.4289	1.42317	-1.63784	0.00179424		4.4289	6.89908	0.639455	0.172636
XLOC_033794	cyp-34A2	Cytochrome P450 | Cytochrome P450, E-class, group I | Cytochrome P450, conserved site	V:15288824-15291107		0.175734	0.71915	2.0329	0.0292735		0.996164	0.175734	-2.50299	0.0405633		0.996164	2.45872	1.30345	0.186294
XLOC_007643	chil-22	Chitinase II | Glycoside hydrolase superfamily | Glycoside hydrolase, catalytic domain | Glycoside hydrolase, family 18, catalytic domain	II:9464473-9466195		0.07847	0.580075	2.88603	0.0292735		1.39993	0.07847	-4.15707	0.00976905		1.39993	2.29183	0.711149	0.364273
XLOC_040000	twk-23	Two pore domain potassium channel | Two pore domain potassium channel domain	X:13817573-13823582		0.179642	1.41422	2.97681	0.0299271		2.27613	0.179642	-3.66339	0.0330495		2.27613	1.6153	-0.494779	0.946678
XLOC_006841	col-20	Collagen triple helix repeat | Nematode cuticle collagen, N-terminal	II:4869606-4870791		913.529	624.996	-0.547604	0.0311817		457.299	913.529	0.998311	0.00179424		457.299	586.395	0.358735	0.145852
XLOC_028454	clec-7	C-type lectin | C-type lectin fold | C-type lectin-like | CUB domain	V:7328396-7330001		0.265029	0.973538	1.87709	0.031815		1.05194	0.265029	-1.98883	0.0125084		1.05194	2.29217	1.12367	0.0635626
XLOC_037214	E02H4.7		X:14256270-14257422		1.22712	4.73099	1.94687	0.0336541		10.7843	1.22712	-3.13559	0.00179424		10.7843	20.0597	0.895366	0.0955325
XLOC_040519	T25G12.6	von Willebrand factor, type A	X:17225157-17230049		0.337066	1.00589	1.57738	0.0336541		1.27164	0.337066	-1.91559	0.00676196		1.27164	2.22694	0.808369	0.180261
XLOC_003258	M04D5.3		I:11339777-11341611		0.961843	2.56033	1.41245	0.0336541		6.87826	0.961843	-2.83817	0.00179424		6.87826	10.2138	0.570407	0.368604
XLOC_027746	W02G9.4	CUB domain	V:2666865-2670229		8.84741	18.2199	1.04218	0.0336541		28.152	8.84741	-1.66991	0.00179424		28.152	31.4636	0.160446	0.860092
XLOC_007230	pmp-1	AAA+ ATPase domain | ABC transporter type 1, transmembrane domain | ABC transporter, conserved site | ABC transporter-like | P-loop containing nucleoside triphosphate hydrolase | Peroxysomal long chain fatty acyl transporter	II:6880700-6883754		2.47677	5.47562	1.14456	0.0366069		8.00116	2.47677	-1.69175	0.00179424		8.00116	11.4479	0.516807	0.250369
XLOC_002084	cpz-1	Cysteine peptidase, asparagine active site | Peptidase C1A | Peptidase C1A, papain C-terminal	I:2686638-2689473		426.557	603.879	0.501523	0.0366069		708.111	426.557	-0.731238	0.00179424		708.111	793.508	0.16427	0.676764
XLOC_004707	R12C12.1	Glycine cleavage system P protein | Glycine cleavage system P protein, homodimeric | Glycine cleavage system P-protein, N-terminal | Pyridoxal phosphate-dependent transferase | Pyridoxal phosphate-dependent transferase, major region, subdomain 1	II:6050374-6054306		22.5142	36.0508	0.679198	0.0394527		50.523	22.5142	-1.16611	0.00179424		50.523	46.8569	-0.108679	0.901179
XLOC_034180	T05E12.3	BTB/POZ fold | BTB/POZ-like | Potassium channel tetramerisation-type BTB domain	V:17076864-17077978		3.66028	8.05471	1.13788	0.0400058		24.2243	3.66028	-2.72643	0.00179424		24.2243	36.4331	0.588794	0.116424
XLOC_019775	F38A1.9,clec-165	C-type lectin | C-type lectin fold | C-type lectin-like	IV:1244187-1246872		0.366804	1.6007	2.12562	0.0411041		3.66615	0.366804	-3.32118	0.00179424		3.66615	4.35382	0.248018	0.926684
XLOC_039918	mxl-3	Myc-type, basic helix-loop-helix (bHLH) domain	X:13349639-13350804		23.2527	40.1409	0.787674	0.0411041		58.1432	23.2527	-1.32221	0.00179424		58.1432	58.7172	0.0141736	0.995586
XLOC_028858	C50F4.1	CHK kinase-like | Protein kinase-like domain | Protein of unknown function DUF227 | Uncharacterised oxidoreductase Dhs-27	V:9526732-9529250		4.89483	9.79675	1.00104	0.0427575		14.2775	4.89483	-1.54441	0.00179424		14.2775	20.9945	0.556271	0.170281
XLOC_012212	mai-2	ATPase inhibitor, IATP, mitochondria	IV:3385637-3386907		1428.12	1012.53	-0.496158	0.0433051		810.977	1428.12	0.816386	0.00179424		810.977	794.939	-0.0288178	0.98612
XLOC_014305	F58G6.9	Ctr copper transporter	IV:9651425-9652491		31.1455	55.3298	0.829031	0.0443973		57.0132	31.1455	-0.87227	0.027346		57.0132	38.6721	-0.560002	0.127156
XLOC_011157	clec-160	C-type lectin | C-type lectin fold | C-type lectin-like | von Willebrand factor, type A	III:8272955-8275971		4.25948	8.03226	0.915129	0.0443973		12.7239	4.25948	-1.57879	0.00179424		12.7239	16.9354	0.412511	0.318386
XLOC_038601	T22B7.7	HotDog domain	X:5651869-5653925		4.95907	9.81194	0.984468	0.0475462		47.861	4.95907	-3.27071	0.00179424		47.861	58.1615	0.281213	0.466715
		* Gene not similarly regulated by 7% O2 and gcy-35 disruption.
