# Supplementary figures and images for: Decoding a neural circuit controlling global animal state in C. elegans
Source: eLife journal article supplement (doi:10.7554/elife.04241), 2015-03-11

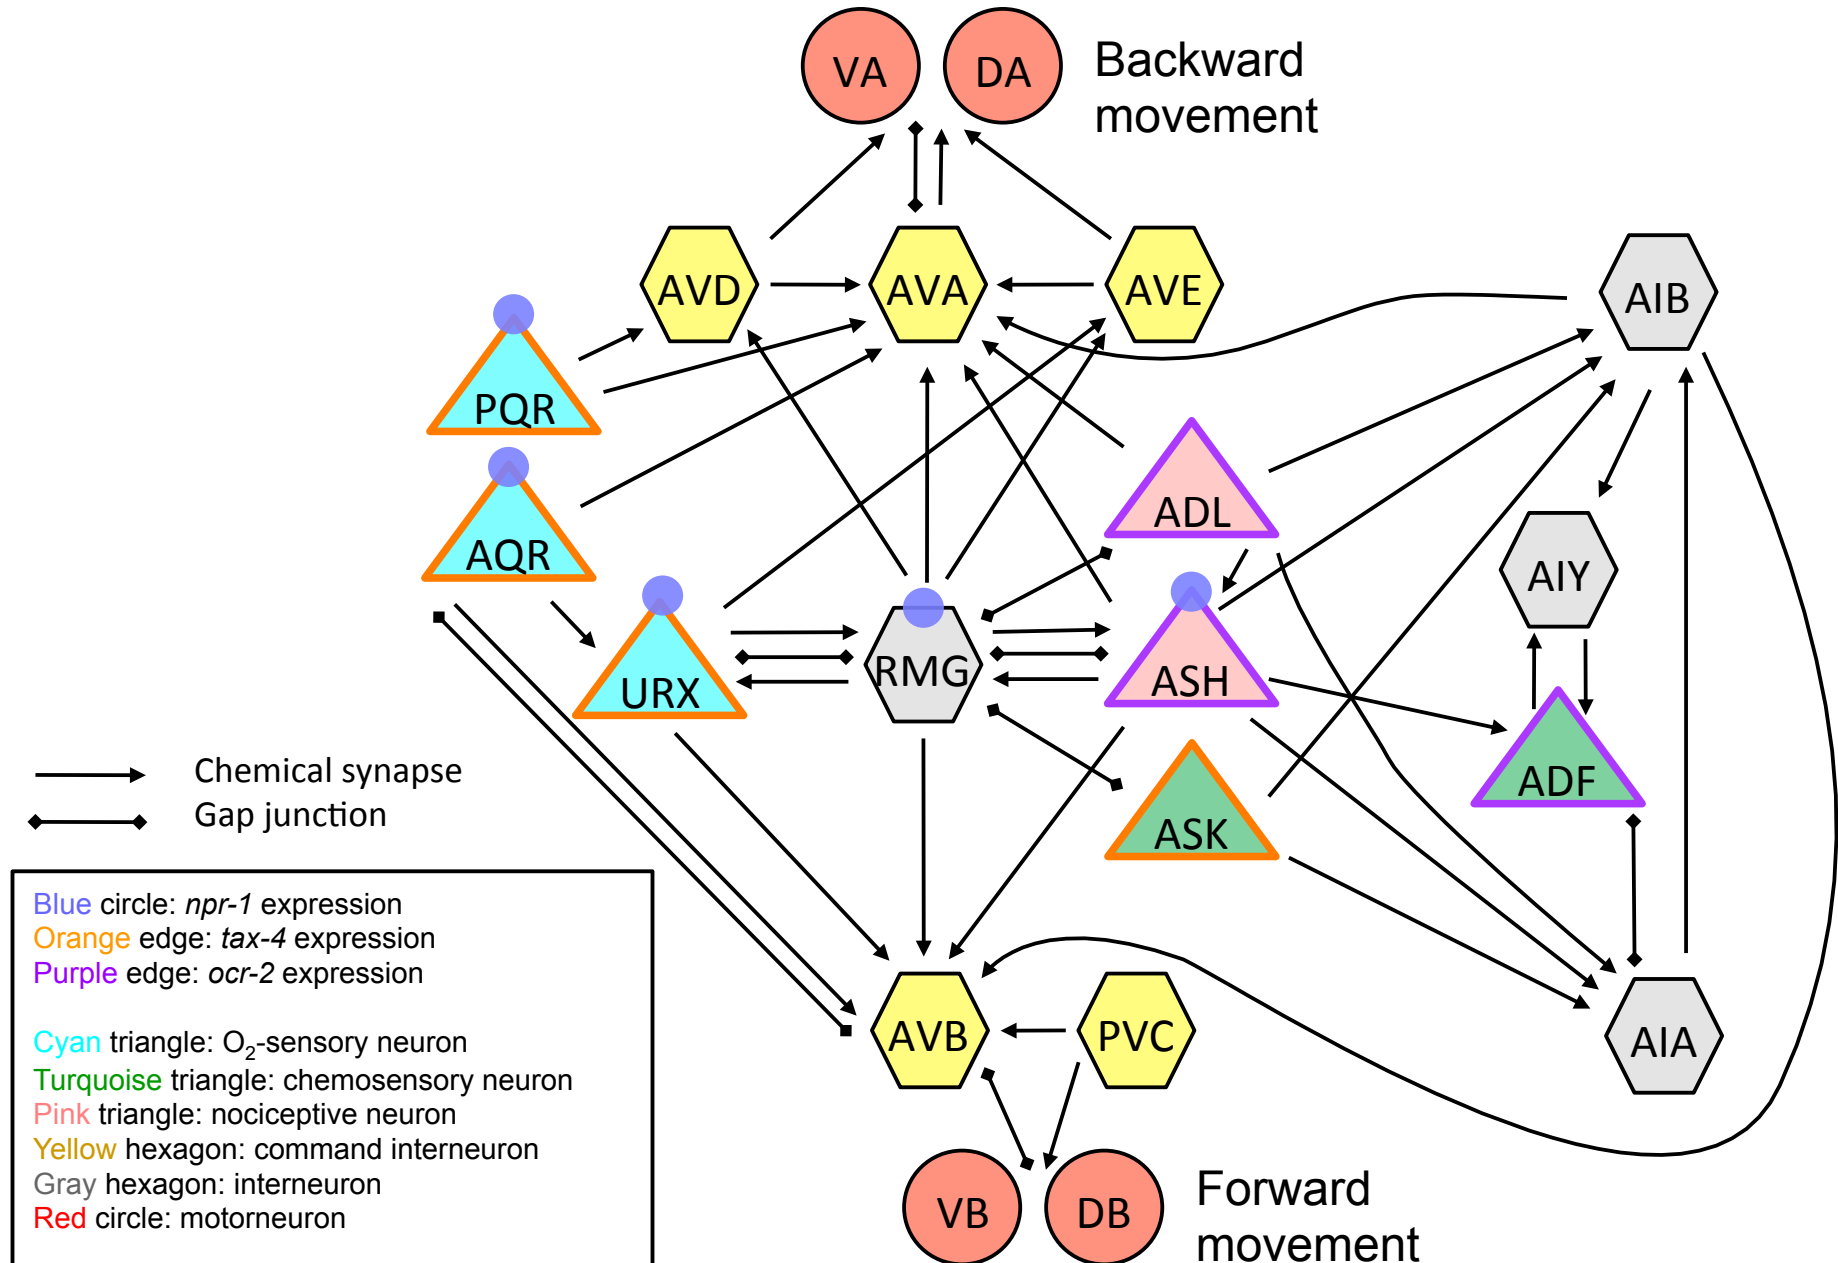

Supplement: supp [file elife_poa_e04241_Figure_1_figure_supplement_1.pdf › elife_poa_e04241_Figure_1_figure_supplement_1.pdf]

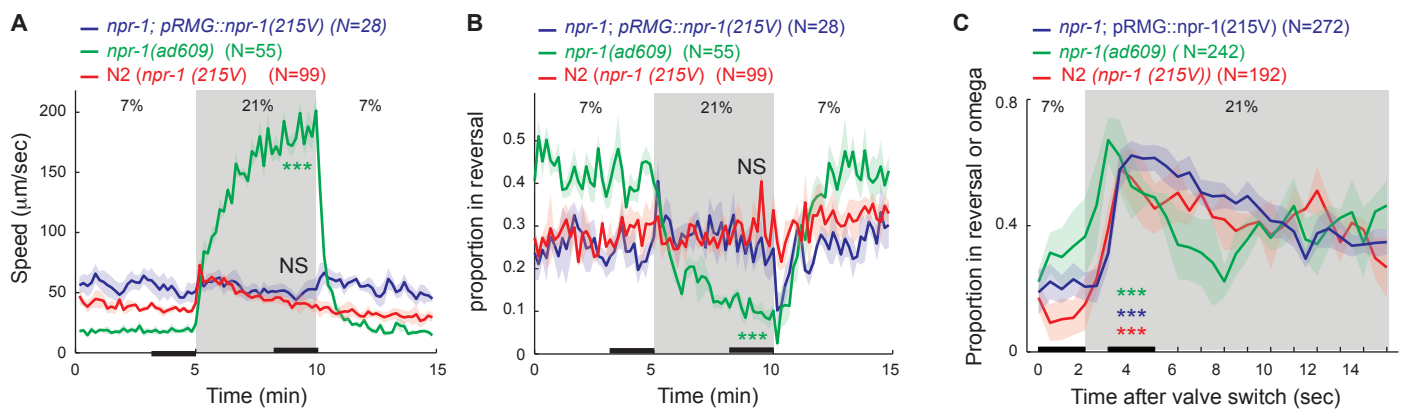

Supplement: supp [file elife_poa_e04241_Figure_2_figure_supplement_1.pdf › elife_poa_e04241_Figure_2_figure_supplement_1.pdf]

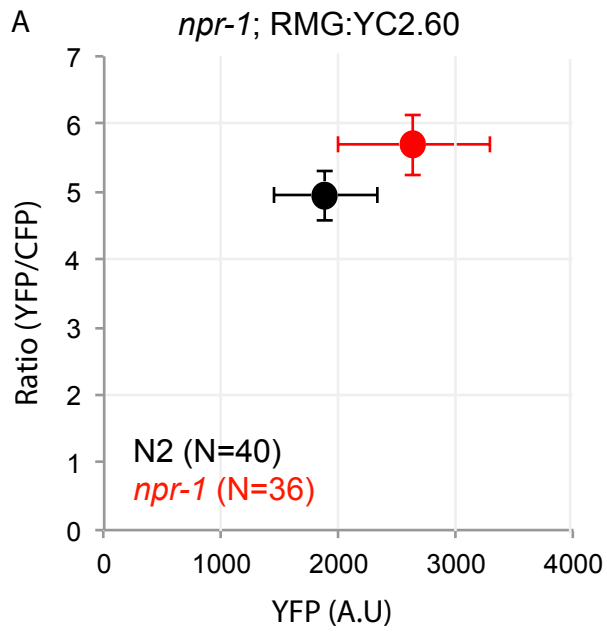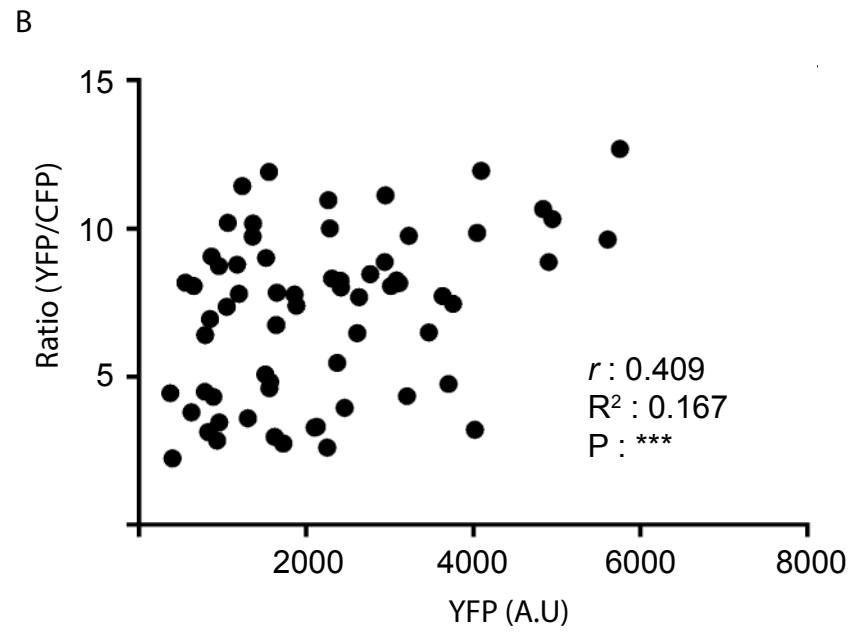

Supplement: supp [file elife_poa_e04241_Figure_2_figure_supplement_2.pdf › elife_poa_e04241_Figure_2_figure_supplement_2.pdf]

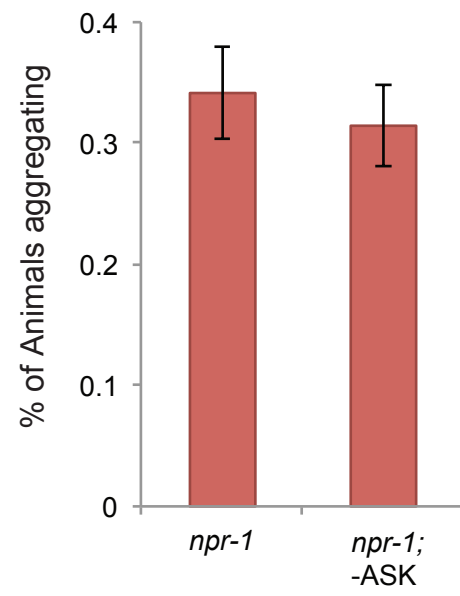

Supplement: supp [file elife_poa_e04241_Figure_3_figure_supplement_1.pdf › elife_poa_e04241_Figure_3_figure_supplement_1.pdf]

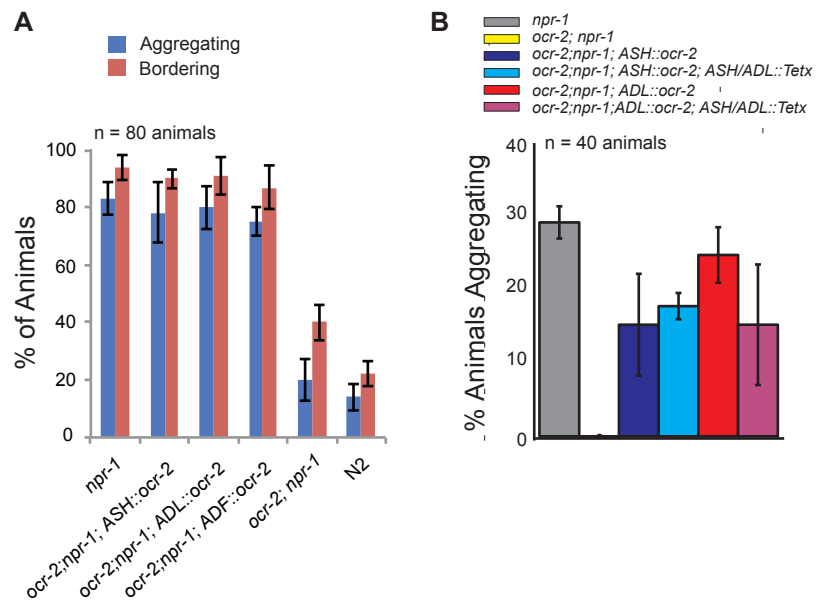

Supplement: supp [file elife_poa_e04241_Figure_4_figure_supplement_1.pdf › elife_poa_e04241_Figure_4_figure_supplement_1.pdf]

# Sample

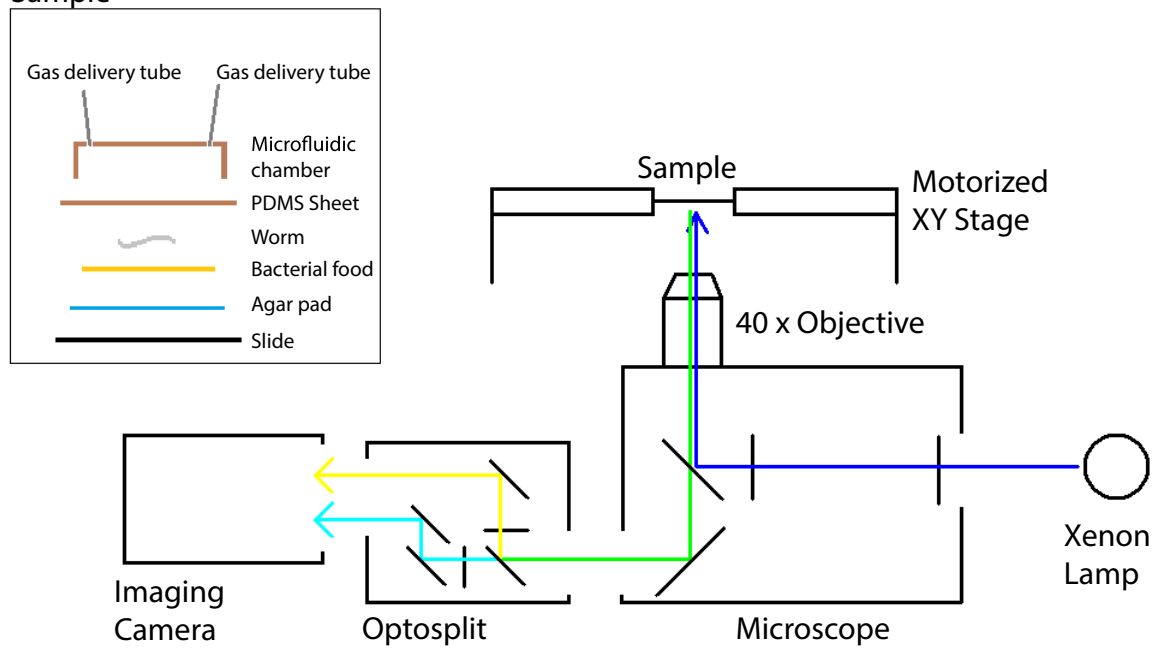

Supplement: supp [file elife_poa_e04241_Figure_8_figure_supplement_1.pdf › elife_poa_e04241_Figure_8_figure_supplement_1.pdf]
